# Supplementary material for: A Metabolomic Approach and Traditional Physical Assessments to Compare U22 Soccer Players According to Their Competitive Level
Source: MDPI journal article supplement (doi:10.3390/biology11081103), 2022-07-25
Supplement: s1 [file s1]

Supplementary Materials for

**A Metabolomic Approach and Classical Physical Assessments to Compare U22  
Soccer Players According to Their Competitive Level**

João P. da Cruz\*, Fábio N. dos Santos, Felipe M. Rasteiro, Anita B. Marostegan, Fúlvia  
B. Manchado-Gobatto, Claudio A. Gobatto.

\*Corresponding author. Email: [jpdacruz97@hotmail.com](mailto:jpdacruz97@hotmail.com)

**This PDF file includes:**

Supplementary table 1

Supplementary table 2

Supplementary figure 1

Supplementary figure 2

**Supplementary table 1.** Differentiated features of the physiological profiles of soccer players from both elite and non-elite teams for the ESI (+) mode by fold-change analysis with threshold 2.

| ESI(+)    |             |          |
|-----------|-------------|----------|
| Features  | Fold Change | log2(FC) |
| M404T1_3  | 0.066231    | -3.9164  |
| M755T3    | 0.22876     | -2.1281  |
| M740T4    | 0.27924     | -1.8404  |
| M1272T8   | 3.5576      | 1.8309   |
| M514T8    | 0.29087     | -1.7816  |
| M974T5_2  | 3.3745      | 1.7547   |
| M660T2    | 3.1414      | 1.6514   |
| M443T2_2  | 0.32328     | -1.6292  |
| M747T4_1  | 0.33368     | -1.5834  |
| M243T2    | 2.8692      | 1.5206   |
| M721T2    | 0.35467     | -1.4955  |
| M605T5    | 2.8189      | 1.4951   |
| M901T7_1  | 2.6509      | 1.4065   |
| M316T0_1  | 2.6448      | 1.4032   |
| M463T1_1  | 2.6396      | 1.4003   |
| M715T4_2  | 2.5922      | 1.3742   |
| M676T2_2  | 2.5366      | 1.3429   |
| M774T5_2  | 2.5064      | 1.3256   |
| M554T7_1  | 2.4824      | 1.3118   |
| M291T1_1  | 2.4544      | 1.2954   |
| M532T1_1  | 2.4439      | 1.2892   |
| M638T2    | 2.4179      | 1.2738   |
| M932T2_2  | 0.4143      | -1.2713  |
| M829T5    | 2.407       | 1.2672   |
| M909T2    | 0.41725     | -1.261   |
| M340T0_2  | 2.3884      | 1.256    |
| M370T0    | 2.3641      | 1.2413   |
| M726T1    | 0.431       | -1.2142  |
| M784T5_3  | 2.3152      | 1.2112   |
| M359T1_1  | 2.2792      | 1.1885   |
| M761T5_1  | 2.2739      | 1.1852   |
| M286T3    | 0.44056     | -1.1826  |
| M209T2_2  | 0.44244     | -1.1764  |
| M763T5_1  | 0.44428     | -1.1704  |
| M820T4    | 2.25        | 1.1699   |
| M583T10   | 2.2305      | 1.1574   |
| M406T1_2  | 2.2258      | 1.1543   |
| M204T2    | 2.2248      | 1.1537   |
| M787T9    | 0.45391     | -1.1395  |
| M238T0_4  | 2.1746      | 1.1208   |
| M765T4_2  | 2.1721      | 1.1191   |
| M238T0_3  | 2.161       | 1.1117   |
| M313T1_2  | 2.1585      | 1.11     |
| M145T0_2  | 2.1557      | 1.1082   |
| M369T1_2  | 2.1525      | 1.106    |
| M1087T1_1 | 0.46624     | -1.1008  |
| M172T20_2 | 2.1078      | 1.0757   |
| M334T1_1  | 2.1074      | 1.0754   |
| M375T1_2  | 0.47463     | -1.0751  |
| M628T7    | 0.47489     | -1.0743  |
| M161T15_2 | 0.47661     | -1.0691  |
| M889T10_3 | 2.0904      | 1.0638   |
| M591T8    | 0.4794      | -1.0607  |
| M773T5_3  | 2.0767      | 1.0543   |
| M635T2_2  | 2.0741      | 1.0525   |
| M293T1    | 0.48406     | -1.0467  |
| M1214T7_1 | 2.0541      | 1.0385   |
| M909T10_1 | 2.0535      | 1.0381   |
| M918T10_3 | 2.0514      | 1.0366   |
| M701T7    | 2.0406      | 1.029    |
| M414T1_4  | 2.0387      | 1.0277   |
| M998T10   | 0.49106     | -1.026   |
| M650T8_1  | 2.0329      | 1.0236   |
| M677T2_2  | 2.0316      | 1.0226   |
| M356T0    | 2.0297      | 1.0213   |
| M887T9_1  | 2.0292      | 1.0209   |
| M591T1    | 0.49313     | -1.0199  |
| M812T5_3  | 0.4932      | -1.0198  |
| M527T1_2  | 0.49432     | -1.0165  |
| M906T10_1 | 0.49455     | -1.0158  |
| M917T9_1  | 2.0216      | 1.0155   |
| M417T2_1  | 0.49624     | -1.0109  |
| M705T12   | 2.0117      | 1.0084   |
| M103T19_2 | 2.008       | 1.0058   |
| M698T5    | 2.0005      | 1.0004   |
| M856T7_1  | 0.49993     | -1.0002  |

**Supplementary table 2.** Differentiated features of the physiological profiles of soccer players from both elite and non-elite teams for the ESI (-) mode by fold-change analysis with threshold 2.

| ESI(-)     |             |          |
|------------|-------------|----------|
| Features   | Fold Change | log2(FC) |
| M798T6     | 0.13076     | -2.935   |
| M348T1_2   | 4.5819      | 2.196    |
| M583T23_1  | 4.1967      | 2.0693   |
| M924T23    | 3.546       | 1.8262   |
| M187T27    | 3.4989      | 1.8069   |
| M608T1_3   | 0.29925     | -1.7406  |
| M495T1     | 0.31587     | -1.6626  |
| M682T3     | 3.1162      | 1.6398   |
| M571T21    | 0.38401     | -1.3808  |
| M465T3_2   | 0.38648     | -1.3715  |
| M671T3     | 2.5728      | 1.3633   |
| M263T1_1   | 2.5546      | 1.3531   |
| M887T7_3   | 2.5442      | 1.3472   |
| M777T7_2   | 2.524       | 1.3357   |
| M993T9     | 0.39713     | -1.3323  |
| M961T23    | 2.4898      | 1.316    |
| M789T6_2   | 2.4542      | 1.2952   |
| M773T6     | 0.40775     | -1.2942  |
| M580T1_3   | 0.40804     | -1.2932  |
| M698T3     | 2.4483      | 1.2918   |
| M300T1_2   | 2.3832      | 1.2529   |
| M966T7     | 0.42145     | -1.2466  |
| M1005T23_2 | 2.3676      | 1.2434   |
| M449T0     | 0.42553     | -1.2327  |
| M949T7_1   | 0.43393     | -1.2045  |
| M620T2     | 2.2954      | 1.1987   |
| M267T1_1   | 2.286       | 1.1928   |
| M447T1_1   | 0.44629     | -1.1639  |
| M803T7_1   | 0.44682     | -1.1622  |
| M349T1_2   | 2.2118      | 1.1452   |
| M954T8     | 2.2051      | 1.1408   |
| M857T6     | 2.1953      | 1.1344   |
| M889T7     | 0.45985     | -1.1207  |
| M846T23    | 2.1735      | 1.12     |
| M338T1_4   | 0.46173     | -1.1149  |
| M397T3_2   | 2.1594      | 1.1107   |
| M734T23    | 2.1467      | 1.1021   |
| M455T1_2   | 0.46588     | -1.102   |
| M483T23_1  | 2.1342      | 1.0937   |
| M797T7_2   | 2.1257      | 1.0879   |
| M724T7     | 2.1188      | 1.0833   |
| M682T8     | 0.47306     | -1.0799  |
| M439T1_1   | 2.1135      | 1.0796   |
| M373T25_1  | 0.47326     | -1.0793  |
| M1137T6    | 2.1006      | 1.0708   |
| M539T2     | 2.078       | 1.0552   |
| M530T23    | 2.0583      | 1.0414   |
| M499T1     | 2.057       | 1.0406   |
| M335T0     | 0.48729     | -1.0372  |
| M752T7_2   | 0.4874      | -1.0368  |
| M827T6_2   | 2.0507      | 1.0361   |
| M369T1_4   | 0.48771     | -1.0359  |
| M247T0_1   | 2.0499      | 1.0355   |
| M833T23    | 0.48808     | -1.0348  |
| M791T6_2   | 2.0452      | 1.0322   |
| M409T3     | 2.0434      | 1.031    |
| M424T2     | 2.0419      | 1.0299   |
| M558T1_1   | 0.48986     | -1.0295  |
| M545T23_2  | 2.0269      | 1.0193   |
| M383T0_1   | 2.0266      | 1.0191   |
| M1217T23   | 2.0172      | 1.0123   |
| M223T0_2   | 0.49677     | -1.0094  |
| M884T8     | 2.0053      | 1.0038   |
| M829T6_1   | 0.49881     | -1.0034  |

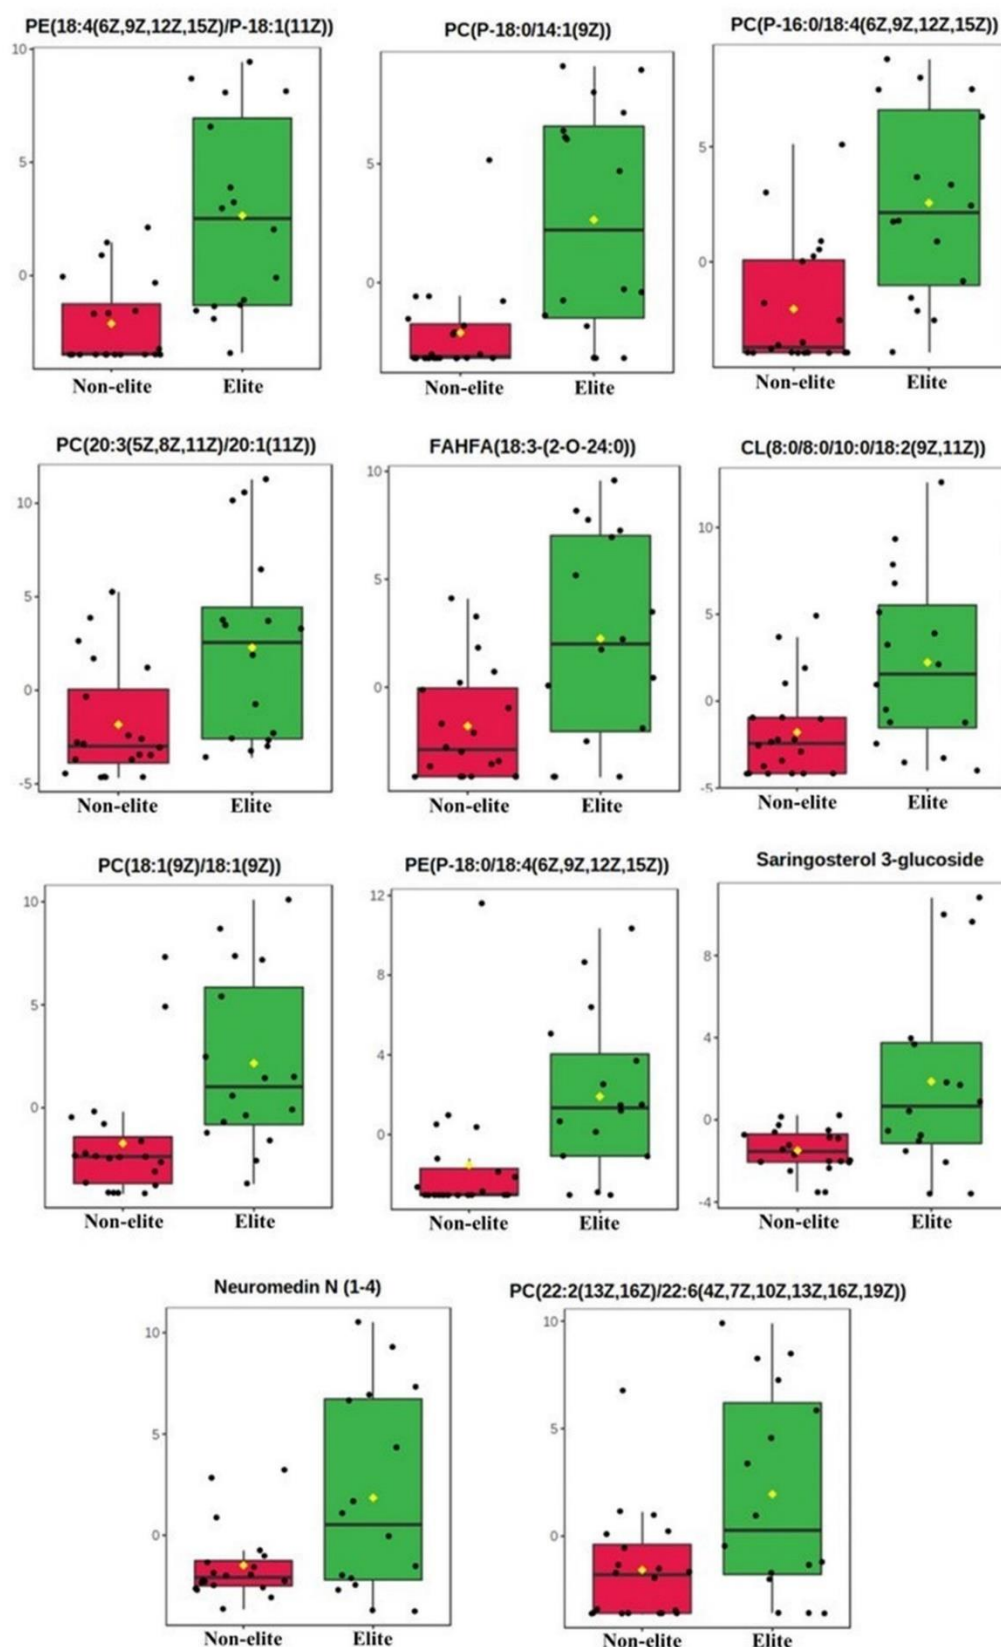

**Supplementary figure 1.** Relative abundances in the mean and standard deviation of the corresponding putative metabolites in each team for the ESI (+) mode. All metabolites are statistically different by fold-change analysis with threshold 2.

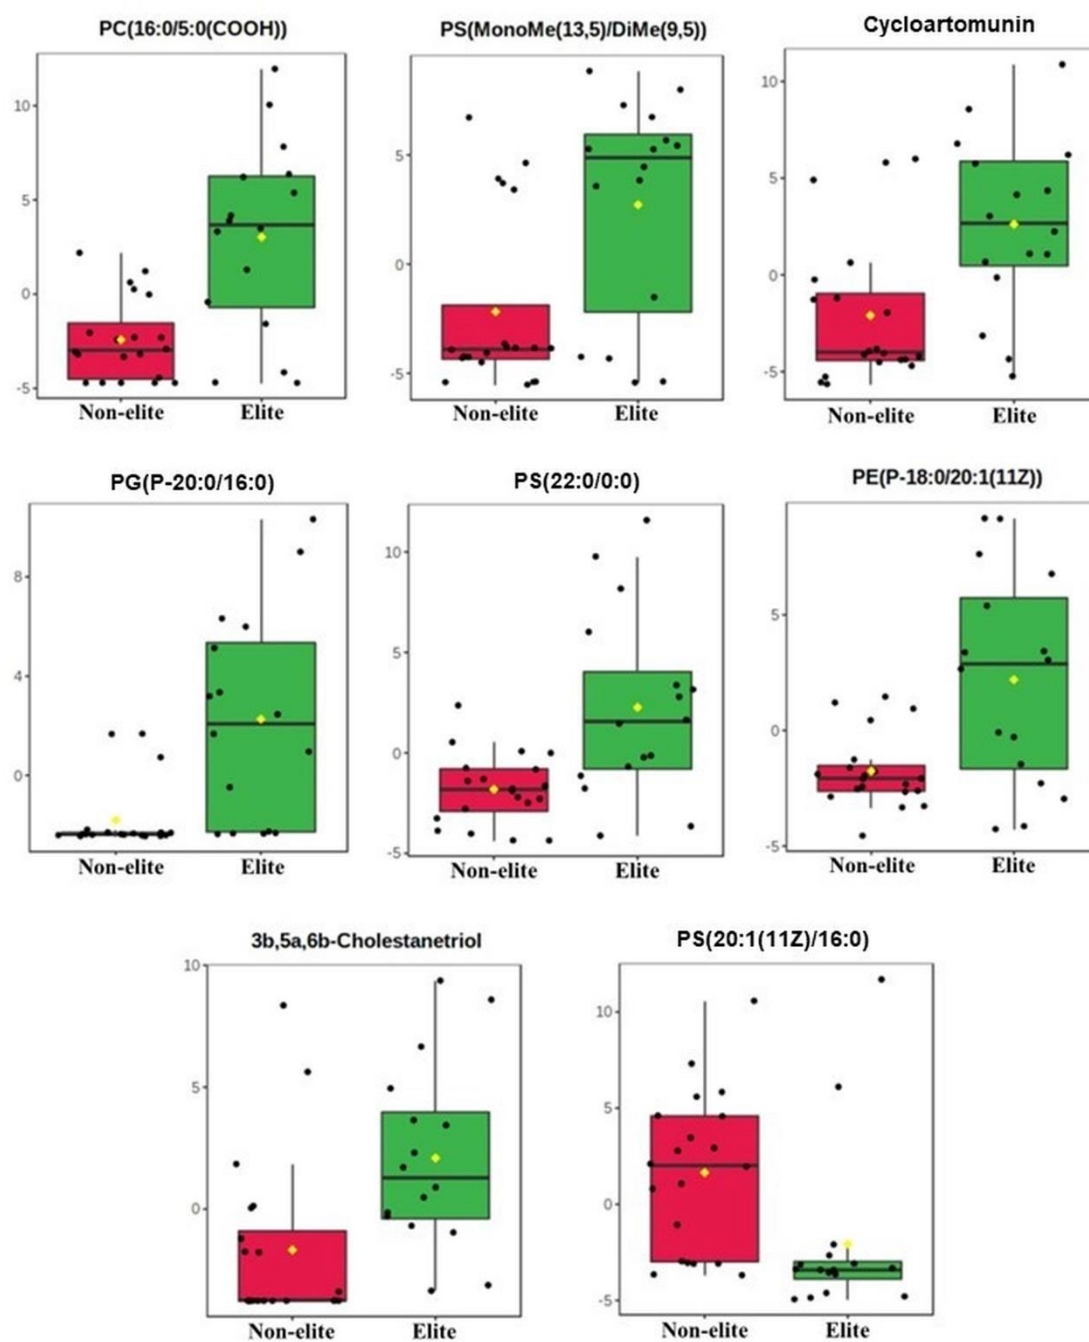

**Supplementary figure 2.** Relative abundances in the mean and standard deviation of the corresponding putative metabolites in each team for the ESI (-) mode. All metabolites are statistically different by fold-change analysis with threshold 2.
